# Supplementary material
Source: publisher figshare collection journal article supplement (https://acs.figshare.com/ndownloader/files/15134888)
Supplement: Supplementary file 1 [file 15134888]

## Supporting Information

### **Carbon formation mechanism of C<sub>2</sub>H<sub>2</sub> in Ni based catalysts revealed by *in situ* electron microscopy and molecular dynamics simulations**

Chunwen Sun<sup>1,2,6\*</sup>, Rui Su<sup>3,5</sup>, Jian Chen<sup>4\*</sup>, Liang Lu,<sup>1</sup> Pengfei Guan<sup>3\*</sup>

<sup>1</sup>CAS Center for Excellence in Nanoscience, Beijing Institute of Nanoenergy and Nanosystems, Chinese Academy of Sciences, Beijing 100083, P. R. China

<sup>2</sup>School of Nanoscience and Technology, University of Chinese Academy of Sciences, Beijing 100049, P. R. China

<sup>3</sup>Beijing Computational Science Research Center, Beijing 100193 China

<sup>4</sup>Nanotechnology Research Centre, National Research Council Canada (NRC), Edmonton, Alberta T6G 2M9, Canada

<sup>5</sup>Innovative Center for Advanced Materials, Hangzhou Dianzi University, Hangzhou 310018, China

<sup>6</sup>Center on Nanoenergy Research, School of Physical Science and Technology, Guangxi University, Nanning 530004, P.R. China

\* Corresponding authors.

E-mail: [sunchunwen@binn.cas.cn](mailto:sunchunwen@binn.cas.cn) (C. Sun); [jian.chen@nrc-cnrc.gc.ca](mailto:jian.chen@nrc-cnrc.gc.ca) (J. Chen) and [pguan@csrc.ac.cn](mailto:pguan@csrc.ac.cn) (P. Guan)

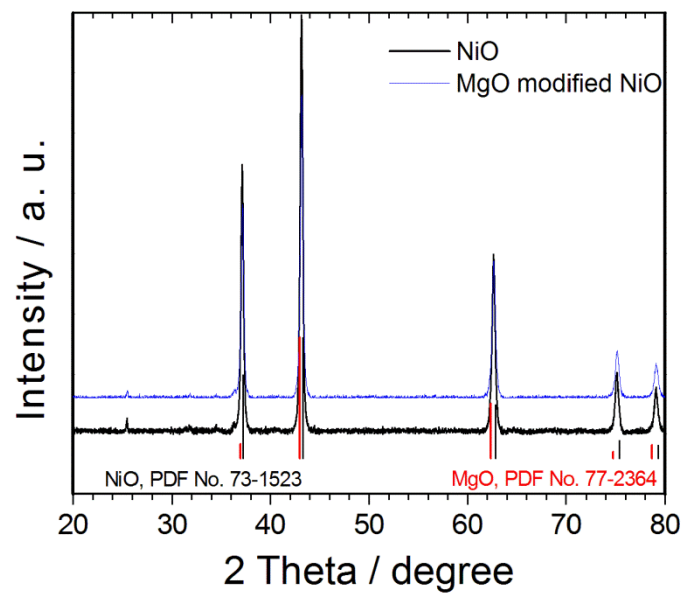

**Figure S1.** XRD patterns of NiO and MgO modified NiO samples.

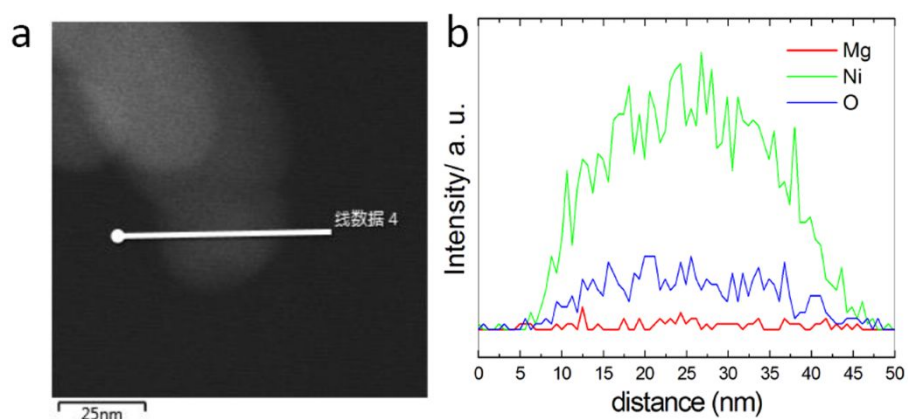

**Figure S2.** (a) ADF STEM image of MgO modified NiO particle and (b) The line scanning profiles of elements across the particle in (a).

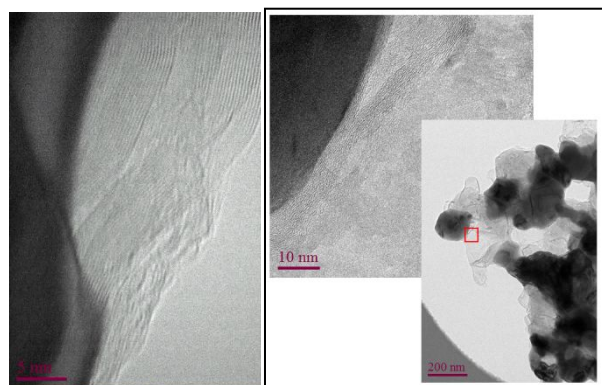

(a)

(b)

**Figure S3.** (a) TEM image showing graphitic layers formed in NiO sample at 800°C under  $\text{H}_2+\text{C}_2\text{H}_2$ . Electron energy loss spectrum (EELS) confirms it is carbon. (b) TEM image showing graphitic layers formed in MgO modified NiO sample at 800°C under  $\text{H}_2+\text{C}_2\text{H}_2$ . The upper left image is the HRTEM of the region marked by the red square in the low magnification image.
